# Supplementary material for: NCS-1 Deficiency Affects mRNA Levels of Genes Involved in Regulation of ATP Synthesis and Mitochondrial Stress in Highly Vulnerable Substantia nigra Dopaminergic Neurons
Source: PubMed Central journal article supplement (PMC6890851; doi:10.3389/fnmol.2019.00252), 2019-11-27
Supplement: Data_Sheet_1.pdf [file Data_Sheet_1.pdf]

## Supplementary Information

Supplementary Figure S1, S2; Supplementary Tables S1 - S5

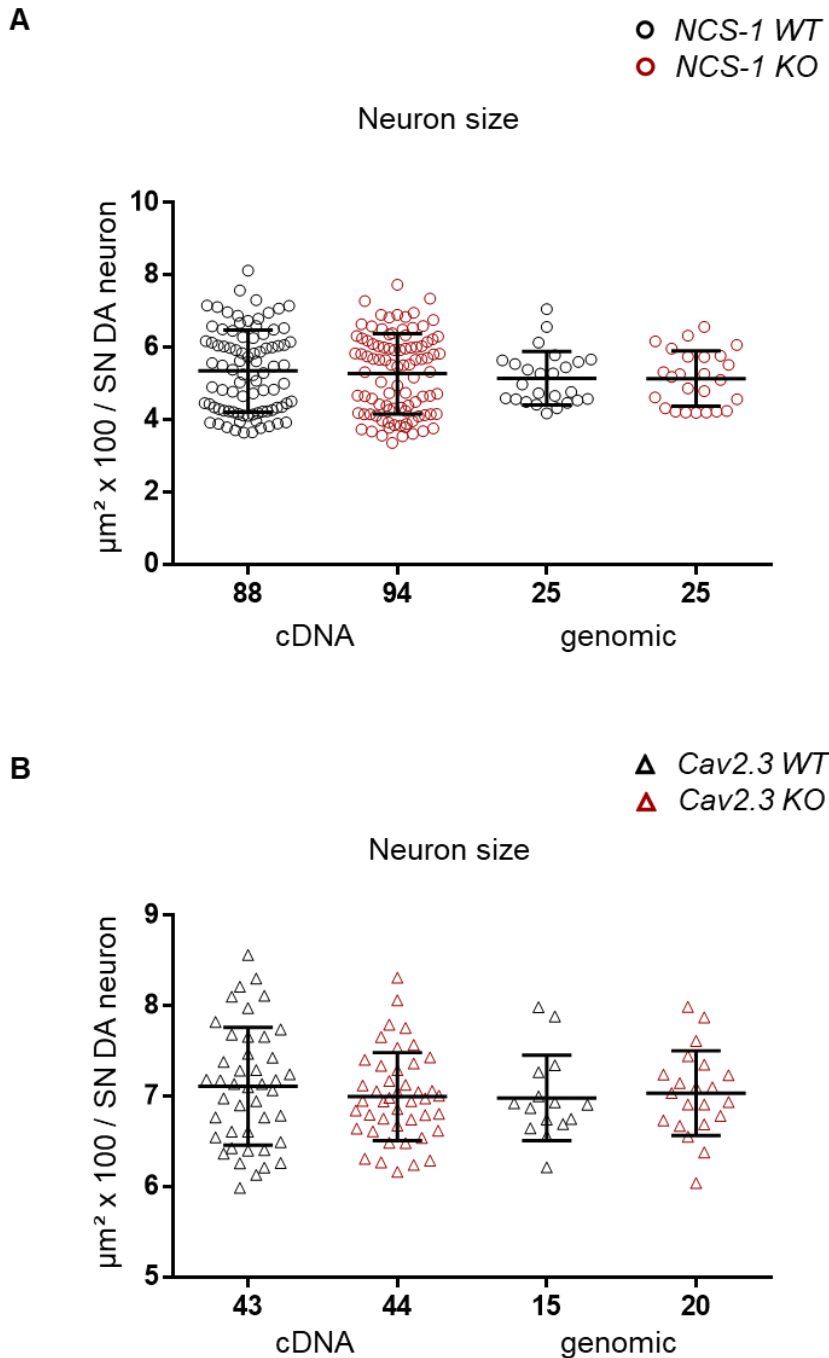

**Figure S1 | SN DA neuron size in NCS-1 and Cav2.3 KO mice.** Size [ $\mu\text{m}^2 \times 100$ ] of the individual laser-microdissected SN DA neurons from pools for cDNA and genomic DNA analysis in juvenile WT and NCS-1 KO mice (**A**), and from adult Cav2.3 WT and KO mice (**B**). As both datasets show no significant difference, RT-qPCR data were normalized to respective lasered cell sizes. Data are given as scatter plots with mean  $\pm$  SD. Number of analyzed cell pools (n) is given on the x-axis. Significances were tested by Mann-Whitney-U tests and t-tests. All data and statistics detailed in Supplementary **Table S2**.

**A Genomic ND1 in NCS-1 WT and KO**

○ *NCS-1 WT*  
 ● *NCS-1 KO*

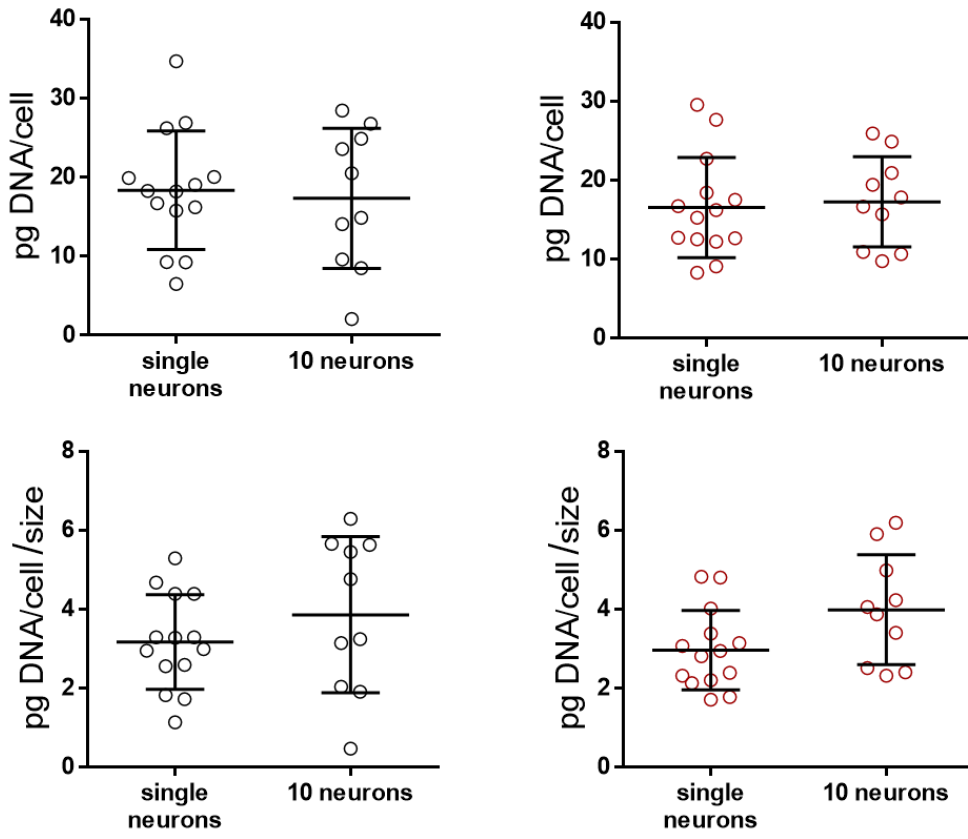

**B Genomic ND1 in Cav2.3 WT and KO**

△ *Cav2.3 WT*  
 ▲ *Cav2.3 KO*

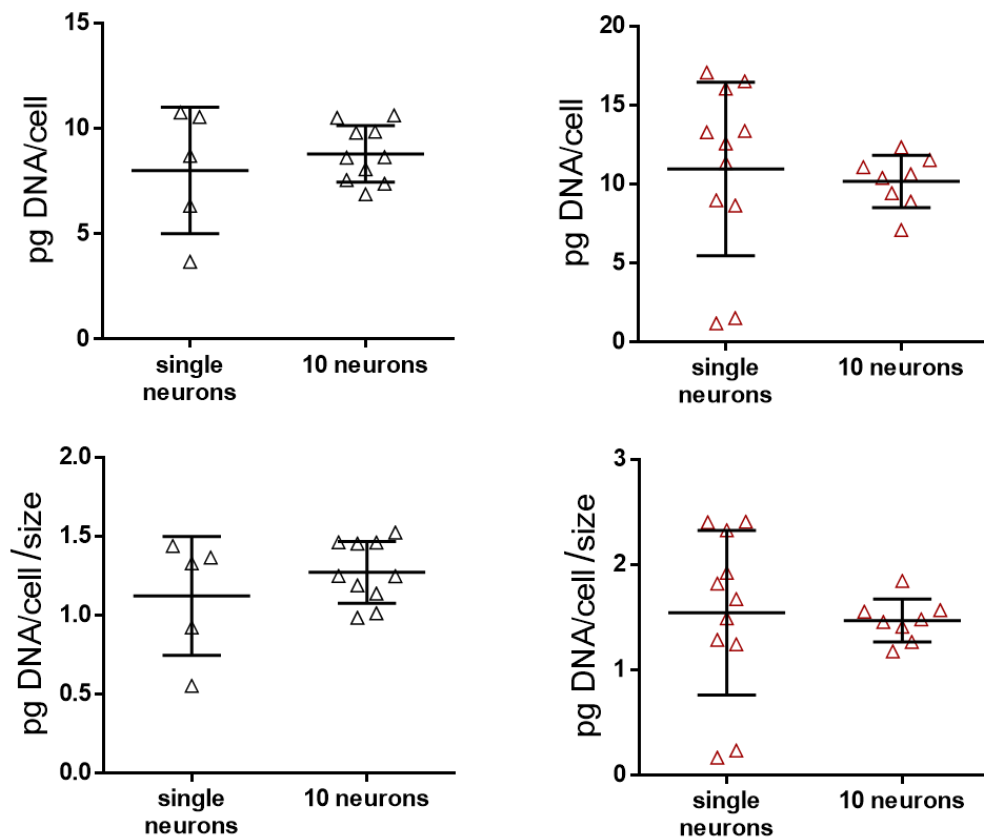

**Figure S2 | Genomic ND1 levels in individual SN DA neurons, derived from either single neurons or pools of 10 neurons.** The determined genomic DNA amount / neuron was derived either from single SN DA neurons, or from 10 pooled neurons. As we detected no significant in mean copy number / individual SN DA neuron between both approaches, respective data sets were pooled. P-values according to Mann-Whitney-U tests: **(A)** NCS-1 WT,  $p=0.93$ ; NCS-1 KO,  $p=0.71$ ; NCS-1 WT/size,  $p=0.28$ ; NCS-1 KO/size,  $p=0.63$ ; **(B)** Cav2.3 WT,  $p>0.99$ ; Cav2.3 KO,  $p=0.31$ ; Cav2.3 WT/size,  $p=0.44$ ; Cav2.3 KO/size,  $p=0.44$ ). Data are given as scatter plots with mean  $\pm$  SD. Data and statistics for WT versus KO comparisons are detailed in Supplementary **Table S2**.

**Table S1 | Primer information for Multiplex (outer) and nested (inner) PCRs of marker genes.** F: forward; R: reverse.

| Gene                                         | Primer    | Sequence (5'-3')       | Genbank accession no. (NCBI) | 5'-Position | Amplicon size [bp] |
|----------------------------------------------|-----------|------------------------|------------------------------|-------------|--------------------|
| Mouse Calbindin-d28k (CB)                    | F (outer) | CGCACTCTCAAAGTAGCCG    | M21531                       | 87          | 891                |
|                                              | R (outer) | CAGCCTACTTCTTTATAGCGCA |                              | 977         |                    |
|                                              | F (inner) | GAGATCTGGCTTCATTTTCGAC |                              | 167         | 440                |
|                                              | R (inner) | AGTTCCAGCTTTCCGTCATTA  |                              | 606         |                    |
| Mouse Glial fibrillary acidic protein (GFAP) | F (outer) | AGAACAACCTGGCTGCGTAT   | K01347                       | 407         | 786                |
|                                              | R (outer) | GCTCCTGCTTCGAGTCCTTA   |                              | 1192        |                    |
|                                              | F (inner) | AGAAAGGTTGAATCGCTGGA   |                              | 472         | 517                |
|                                              | R (inner) | CCAGGGCTAGCTTAACGTTG   |                              | 988         |                    |
| Mouse Glutamate decarboxylase (GAD65)        | F (outer) | CATACGCAGACAGCACGTTT   | NM_008078.1                  | 166         | 905                |
|                                              | R (outer) | AAAAGATTCCATCGCCAGAG   |                              | 1070        |                    |
|                                              | F (inner) | GGGATGTCAACTACGCGTTT   |                              | 606         | 389                |
|                                              | R (inner) | CACAAATACAGGGGCGATCT   |                              | 994         |                    |
| Mouse Glutamate decarboxylase (GAD67)        | F (outer) | TGACATCGACTGCCAATACC   | Z49976                       | 731         | 1105               |
|                                              | R (outer) | GGGTTAGAGATGACCATCCG   |                              | 1835        |                    |
|                                              | F (inner) | CATATGAAATTGCACCCGTG   |                              | 761         | 702                |
|                                              | R (inner) | CGGTGTCATAGGAGACGTCA   |                              | 1462        |                    |
| Mouse Tyrosine hydroxylase (TH)              | F (outer) | CACCTGGAGTACTTTGTGCG   | M69200                       | 387         | 1139               |
|                                              | R (outer) | CCTGTGGGTGGTACCCTATG   |                              | 1525        |                    |
|                                              | F (inner) | TGCACACAGTACATCCGTCA   |                              | 936         | 377                |
|                                              | R (inner) | TCTGACACGAAGTACACCGG   |                              | 1312        |                    |

**Table S2 | Lasered neuron sizes, and qPCR results for ND1 (cDNA and genomic) and ENO2 (cDNA) for SN DA neurons from NCS-1 and Cav2.3 WT and respective KO mice.** Data and statistics for graphs shown in **Figures S1, 2 and 4A.** (n) indicates the number of detected signals, from all tested cell pools (given in brackets), derived from (N) mice. P-values according to Mann-Whitney-U tests and significant differences are marked with (\*). As similarity between WT and KO is essential for using neuron size as a normalization strategy, we additionally used t-tests in these cases after positive testing for Gaussian distribution. Respective p-values are marked with (<sup>T</sup>). Both significance tests did not detect any alterations in neuron size between WT and KO. ND1 cDNA levels reflect cDNA + genomic DNA-derived signals, as the ND1 gene contains no intron.

|                                                               | NCS-1 WT  |      |       |        |        |    | NCS-1 KO  |      |       |        |         |    | p-value                       |
|---------------------------------------------------------------|-----------|------|-------|--------|--------|----|-----------|------|-------|--------|---------|----|-------------------------------|
|                                                               | mean      | ±SEM | ±SD   | median | n      | N  | mean      | ±SEM | ±SD   | median | n       | N  |                               |
| <b>Neuron size. cDNA</b><br>[µm <sup>2</sup> x 100]           | 5.34      | 0.12 | 1.14  | 5.33   | 88(88) | 18 | 5.27      | 0.11 | 1.11  | 5.51   | 94 (94) | 18 | 0.6195<br>0.6451 <sup>T</sup> |
| <b>Neuron size. genom.</b><br>[µm <sup>2</sup> x 100]         | 5.14      | 0.15 | 0.74  | 4.97   | 25(25) | 3  | 5.13      | 0.15 | 0.76  | 5.18   | 25(25)  | 3  | 0.9272<br>0.9641 <sup>T</sup> |
| <b>Relative qPCR results</b>                                  |           |      |       |        |        |    |           |      |       |        |         |    |                               |
| <b>ND1 cDNA</b><br>[pg/cell]                                  | 41.00     | 2.29 | 21.40 | 37.58  | 87(88) | 18 | 37.51     | 2.40 | 23.15 | 30.00  | 93(94)  | 18 | 0.1413                        |
| <b>ND1 genom single neurons</b><br>[pg/cell]                  | 18.36     | 2.00 | 7.47  | 18.25  | 14(15) | 3  | 16.54     | 1.70 | 6.35  | 15.73  | 14(15)  | 3  | 0.3580                        |
| <b>ND1 genom 10 neurons</b><br>[pg/cell]                      | 17.34     | 2.80 | 8.85  | 17.69  | 10(10) | 3  | 17.26     | 1.81 | 5.72  | 17.24  | 10(10)  | 3  | 0.9869                        |
| <b>ND1 genom. pooled data</b><br>[pg/cell]                    | 17.94     | 1.61 | 7.91  | 18.25  | 24(25) | 3  | 16.84     | 1.22 | 5.98  | 16.43  | 24(25)  | 3  | 0.5430                        |
| <b>ENO2 cDNA</b><br>[pg/cell]                                 | 63,98     | 4.95 | 46.12 | 41.14  | 87(88) | 18 | 44.05     | 3.25 | 29.75 | 38.78  | 84(94)  | 18 | <b>0.0274*</b>                |
| <b>qPCR results, normalized to neuron sizes</b>               |           |      |       |        |        |    |           |      |       |        |         |    |                               |
| <b>ND1 cDNA</b><br>[pg/µm <sup>2</sup> x 100]                 | 7.99      | 0.40 | 3.66  | 7.85   | 87(88) | 18 | 6.57      | 0.35 | 3.26  | 5.99   | 93(94)  | 18 | <b>0.0152*</b>                |
| <b>ND1 genom single neurons</b><br>[pg/µm <sup>2</sup> x 100] | 3.17      | 0.32 | 1.20  | 3.14   | 14(15) | 3  | 2.97      | 0.27 | 1.01  | 2.88   | 14(15)  | 3  | 0.5637                        |
| <b>ND1 genom 10 neurons</b><br>[pg/µm <sup>2</sup> x 100]     | 3.86      | 0.62 | 1.98  | 4.00   | 10(10) | 3  | 3.99      | 0.44 | 1.39  | 3.97   | 10(10)  | 3  | 0.8534                        |
| <b>ND1 genom. pooled data</b><br>[pg/µm <sup>2</sup> x 100]   | 3.45      | 0.32 | 1.57  | 3.26   | 24(25) | 3  | 3.39      | 0.26 | 1.26  | 3.11   | 24(25)  | 3  | 0.8182                        |
| <b>ENO2</b><br>[pg/µm <sup>2</sup> x 100]                     | 11.47     | 0.75 | 6.81  | 9.14   | 87(88) | 18 | 8.24      | 0.53 | 4.71  | 7.47   | 84(94)  | 18 | <b>0.0034*</b>                |
|                                                               | Cav2.3 WT |      |       |        |        |    | Cav2.3 KO |      |       |        |         |    | p-value                       |
|                                                               | mean      | ±SEM | ±SD   | median | n      | N  | mean      | ±SEM | ±SD   | median | n       | N  |                               |
| <b>Neuron size. cDNA</b><br>[µm <sup>2</sup> x 100]           | 7.11      | 0.10 | 0.65  | 7.13   | 43(43) | 5  | 7.00      | 0.07 | 0.49  | 6.96   | 44(44)  | 5  | 0.4280<br>0.3596 <sup>T</sup> |
| <b>Neuron size. genom.</b><br>[µm <sup>2</sup> x 100]         | 6.98      | 0.12 | 0.47  | 6.90   | 15(15) | 2  | 7.03      | 0.10 | 0.47  | 7.04   | 20(20)  | 3  | 0.5414<br>0.7381 <sup>T</sup> |

Dopaminergic gene expression in NCS-1 KO

|                                                                              | Relative qPCR results                    |      |      |       |        |   |       |      |       |       |        |   |                |
|------------------------------------------------------------------------------|------------------------------------------|------|------|-------|--------|---|-------|------|-------|-------|--------|---|----------------|
| <b>ND1 cDNA</b><br>[pg/cell]                                                 | 12.86                                    | 0.54 | 3.52 | 12.51 | 42(43) | 5 | 14.52 | 0.58 | 3.85  | 13.81 | 44(44) | 5 | <b>0.0334*</b> |
| <b>ND1 genom<br/>single<br/>neurons</b><br>[pg/cell]                         | 8.01                                     | 1.34 | 3.00 | 8.71  | 5(10)  | 2 | 10.95 | 1.66 | 5.49  | 12.57 | 11(11) | 3 | 0.1804         |
| <b>ND1 genom<br/>10 neurons</b><br>[pg/cell]                                 | 8.79                                     | 0.42 | 1.34 | 8.64  | 10(10) | 2 | 10.17 | 0.59 | 1.66  | 10.51 | 8(9)   | 3 | 0.0676         |
| <b>ND1 genom.<br/>pooled data</b><br>[pg/cell]                               | 8.53                                     | 0.51 | 1.97 | 8.65  | 15(15) | 2 | 10.62 | 0.97 | 4.24  | 11.08 | 19(20) | 3 | <b>0.0153*</b> |
| <b>ENO2 cDNA</b><br>[pg/cell]                                                | 47.65                                    | 2.87 | 18.6 | 43.50 | 42(43) | 5 | 49.70 | 3.24 | 21.47 | 49.12 | 44(44) | 5 | 0.5501         |
|                                                                              | qPCR results, normalized to neuron sizes |      |      |       |        |   |       |      |       |       |        |   |                |
| <b>ND1 cDNA</b><br>[pg/ $\mu\text{m}^2 \times 100$ ]                         | 1.81                                     | 0.07 | 0.46 | 1.73  | 42(43) | 5 | 2.07  | 0.07 | 0.49  | 1.94  | 44(44) | 5 | <b>0.0062*</b> |
| <b>ND1 genom<br/>single<br/>neurons</b><br>[pg/ $\mu\text{m}^2 \times 100$ ] | 1.12                                     | 0.17 | 0.38 | 1.33  | 5(10)  | 2 | 1.54  | 0.24 | 0.78  | 1.67  | 11(11) | 3 | 0.2212         |
| <b>ND1 genom<br/>10 neurons</b><br>[pg/ $\mu\text{m}^2 \times 100$ ]         | 1.27                                     | 0.06 | 0.20 | 1.25  | 10(10) | 2 | 1.47  | 0.07 | 0.20  | 1.47  | 8(9)   | 3 | 0.0676         |
| <b>ND1 genom.<br/>pooled data</b><br>[pg/ $\mu\text{m}^2 \times 100$ ]       | 1.22                                     | 0.07 | 0.27 | 1.25  | 15(20) | 2 | 1.51  | 0.60 | 0.60  | 1.49  | 19(20) | 3 | <b>0.0153*</b> |
| <b>ENO2</b><br>[pg/ $\mu\text{m}^2 \times 100$ ]                             | 6.68                                     | 0.37 | 2.38 | 6.48  | 42(43) | 5 | 7.05  | 0.44 | 2.92  | 7.16  | 44(44) | 5 | 0.5330         |

**Table S3 | RT-qPCR Data for genes as indicated from SN DA neurons of NCS-1 WT and KO mice.** Data and statistics for graphs shown in **Figure 3A/B/C**. (n) indicates the number of detected signals, from all tested cell pools (given in brackets), derived from (N) mice. P-values according to Mann-Whitney-U tests and significant differences are marked with (\*).

|                                                                               | NCS-1 WT |       |       |        |        |   | NCS-1 KO |       |       |        |        |   | p-value            |
|-------------------------------------------------------------------------------|----------|-------|-------|--------|--------|---|----------|-------|-------|--------|--------|---|--------------------|
|                                                                               | mean     | ±SEM  | ±SD   | median | n      | N | mean     | ±SEM  | ±SD   | median | n      | N |                    |
| <b>Relative qPCR results [pg cDNA/cell]</b>                                   |          |       |       |        |        |   |          |       |       |        |        |   |                    |
| <b>UCP2</b>                                                                   | 402.9    | 132.2 | 373.9 | 270.1  | 8(15)  | 4 | 306.1    | 230.4 | 564.3 | 18.44  | 6(15)  | 4 | 0.5728             |
| <b>UCP4</b>                                                                   | 117.9    | 13.28 | 39.83 | 115.6  | 9(9)   | 3 | 52.25    | 9.296 | 29.40 | 51.10  | 10(10) | 3 | <b>0.0004*</b>     |
| <b>UCP5</b>                                                                   | 48.29    | 12.11 | 36.34 | 35.25  | 9(9)   | 3 | 20.11    | 2.942 | 8.827 | 22.07  | 9(10)  | 3 | <b>0.0188*</b>     |
| <b>MCU</b>                                                                    | 44.65    | 10.12 | 30.35 | 33.29  | 9(10)  | 3 | 40.69    | 10.68 | 28.26 | 35.58  | 7(10)  | 3 | 0.8371             |
| <b>LETM1</b>                                                                  | 109.5    | 16.83 | 47.61 | 107.9  | 8(9)   | 4 | 71.02    | 12.82 | 38.47 | 58.23  | 9(9)   | 4 | 0.0927             |
| <b>mNCX</b>                                                                   | -        | -     | -     | -      | 2(9)   | 3 | -        | -     | -     | -      | 0(10)  | 3 | -                  |
|                                                                               |          |       |       |        |        |   |          |       |       |        |        |   |                    |
| <b>DJ-1</b>                                                                   | 265.2    | 39.85 | 143.7 | 237.6  | 13(13) | 6 | 116.9    | 14.78 | 49.02 | 102.6  | 11(14) | 6 | <b>0.0041*</b>     |
| <b>SNCA</b>                                                                   | 1152.0   | 167.8 | 474.6 | 1087.0 | 8(9)   | 3 | 1069.0   | 205.1 | 542.7 | 810.5  | 7(8)   | 4 | 0.4634             |
| <b>PGC-1α</b>                                                                 | 46.84    | 10.89 | 34.44 | 37.66  | 10(10) | 4 | 47.38    | 16.66 | 44.09 | 35.46  | 7(8)   | 4 | 0.9623             |
| <b>GBA1</b>                                                                   | 52.21    | 5.251 | 15.75 | 53.01  | 9(10)  | 4 | 41.30    | 9.32  | 26.36 | 37.18  | 8(8)   | 4 | 0.1996             |
|                                                                               |          |       |       |        |        |   |          |       |       |        |        |   |                    |
| <b>Cav1.3</b>                                                                 | 68.37    | 12.92 | 38.76 | 52.97  | 9(10)  | 4 | 49.38    | 10.49 | 33.17 | 40.75  | 10(10) | 3 | 0.1823             |
| <b>Cav2.3</b>                                                                 | 706.3    | 54.82 | 245.2 | 680.2  | 20(20) | 5 | 354.9    | 41.79 | 186.9 | 347.3  | 20(20) | 4 | <b>&lt;0.0001*</b> |
| <b>Cav3.1</b>                                                                 | 621.3    | 75.56 | 238.9 | 714.5  | 10(10) | 4 | 493.8    | 89.36 | 282.6 | 378.6  | 10(10) | 4 | 0.3527             |
| <b>Kv4.3</b>                                                                  | 448.9    | 60.79 | 192.2 | 397.1  | 10(10) | 3 | 487.2    | 127.7 | 383.0 | 354.0  | 9(10)  | 3 | 0.9048             |
| <b>KChip3</b>                                                                 | 202.5    | 29.26 | 92.53 | 204.4  | 10(10) | 3 | 203.9    | 43.89 | 138.8 | 147.6  | 10(10) | 3 | 0.6842             |
| <b>qPCR results, normalized to neuron size [pg cDNA/μm<sup>2</sup> x 100]</b> |          |       |       |        |        |   |          |       |       |        |        |   |                    |
| <b>UCP2</b>                                                                   | 63.61    | 20.95 | 59.26 | 46.98  | 8(15)  | 4 | 46.74    | 33.80 | 82.79 | 2.68   | 6(15)  | 4 | 0.5728             |
| <b>UCP4</b>                                                                   | 19.93    | 2.07  | 6.20  | 20.01  | 9(9)   | 3 | 8.82     | 1.58  | 5.01  | 8.62   | 10(10) | 3 | <b>0.0003*</b>     |
| <b>UCP5</b>                                                                   | 8.09     | 1.96  | 5.89  | 5.71   | 9(9)   | 3 | 3.37     | 0.49  | 1.47  | 3.84   | 9(10)  | 3 | <b>0.0142*</b>     |
| <b>MCU</b>                                                                    | 7.49     | 1.84  | 5.53  | 5.13   | 9(10)  | 3 | 6.79     | 1.94  | 5.12  | 5.20   | 7(10)  | 3 | 0.9182             |
| <b>LETM1</b>                                                                  | 25.86    | 4.45  | 12.59 | 23.77  | 8(9)   | 4 | 17.55    | 3.46  | 10.39 | 14.97  | 9(9)   | 4 | 0.0927             |
| <b>mNCX</b>                                                                   | -        | -     | -     | -      | 2(9)   | 3 | -        | -     | -     | -      | 0(10)  | 3 | -                  |
|                                                                               |          |       |       |        |        |   |          |       |       |        |        |   |                    |
| <b>DJ-1</b>                                                                   | 57.80    | 3.53  | 32.25 | 46.86  | 13(13) | 6 | 27.49    | 3.53  | 11.71 | 26.84  | 11(14) | 6 | <b>0.0129*</b>     |
| <b>SNCA</b>                                                                   | 296.2    | 47.15 | 133.4 | 271.8  | 8(9)   | 3 | 269.5    | 45.82 | 121.2 | 207.2  | 7(8)   | 4 | 0.4634             |
| <b>PGC-1α</b>                                                                 | 11.08    | 2.43  | 7.68  | 9.07   | 10(10) | 4 | 11.04    | 3.60  | 9.51  | 9.40   | 7(8)   | 4 | 0.8868             |
| <b>GBA1</b>                                                                   | 12.64    | 1.30  | 3.89  | 13.51  | 9(10)  | 4 | 9.84     | 2.00  | 5.66  | 8.56   | 8(8)   | 4 | 0.1996             |
|                                                                               |          |       |       |        |        |   |          |       |       |        |        |   |                    |
| <b>Cav1.3</b>                                                                 | 9.51     | 1.53  | 4.60  | 8.33   | 9(10)  | 4 | 7.83     | 1.45  | 4.58  | 6.97   | 10(10) | 3 | 0.3562             |
| <b>Cav2.3</b>                                                                 | 106.0    | 9.15  | 40.90 | 93.50  | 20(20) | 5 | 56.47    | 6.72  | 30.03 | 54.21  | 20(20) | 4 | <b>&lt;0.0001*</b> |
| <b>Cav3.1</b>                                                                 | 94.76    | 12.05 | 38.11 | 97.45  | 10(10) | 4 | 77.82    | 14.89 | 47.09 | 53.46  | 10(10) | 4 | 0.4359             |
| <b>Kv4.3</b>                                                                  | 70.23    | 10.21 | 32.28 | 63.33  | 10(10) | 3 | 78.05    | 20.22 | 60.65 | 59.29  | 9(10)  | 3 | 0.9682             |
| <b>KChip3</b>                                                                 | 31.77    | 5.11  | 16.16 | 28.68  | 10(10) | 3 | 33.53    | 7.56  | 23.90 | 23.58  | 10(10) | 3 | 0.8534             |

**Table S4 | RT-qPCR Data for genes as indicated from SN DA neurons of Cav2.3 WT and KO mice.** Data and statistics for graphs shown in **Figure 4B**. (n) indicates the number of detected qPCR signals, from all tested cell pools (given in brackets), derived from (N) mice. P-values according to Mann-Whitney-U tests.

|             | Cav2.3 WT                                                                     |      |       |        |        |   | Cav2.3 KO |      |       |        |        |   | p-value |  |
|-------------|-------------------------------------------------------------------------------|------|-------|--------|--------|---|-----------|------|-------|--------|--------|---|---------|--|
|             | mean                                                                          | ±SEM | ±SD   | median | n      | N | mean      | ±SEM | ±SD   | median | n      | N |         |  |
|             | <b>Relative qPCR results [pg cDNA/cell]</b>                                   |      |       |        |        |   |           |      |       |        |        |   |         |  |
| <b>DJ-1</b> | 68.98                                                                         | 8.14 | 25.75 | 60.8   | 10(10) | 3 | 61.81     | 10.8 | 34.16 | 56.61  | 10(10) | 3 | 0.5787  |  |
| <b>UCP4</b> | 39.81                                                                         | 3.88 | 12.27 | 40.24  | 10(10) | 3 | 53.38     | 9.04 | 28.59 | 53.21  | 10(10) | 3 | 0.2475  |  |
| <b>UCP5</b> | 35.53                                                                         | 4.59 | 18.37 | 33.28  | 16(16) | 4 | 41.14     | 4.43 | 17.71 | 38.16  | 16(16) | 4 | 0.2871  |  |
|             | <b>qPCR results, normalized to neuron size [pg cDNA/μm<sup>2</sup> x 100]</b> |      |       |        |        |   |           |      |       |        |        |   |         |  |
| <b>DJ-1</b> | 9.50                                                                          | 0.89 | 2.81  | 8.50   | 10(10) | 3 | 8.89      | 1.50 | 4.73  | 8.11   | 10(10) | 3 | 0.6305  |  |
| <b>UCP4</b> | 5.88                                                                          | 0.60 | 1.91  | 5.99   | 10(10) | 3 | 7.55      | 1.24 | 3.92  | 7.62   | 10(10) | 3 | 0.2799  |  |
| <b>UCP5</b> | 5.16                                                                          | 0.69 | 2.77  | 4.65   | 16(16) | 4 | 5.87      | 0.63 | 2.51  | 5.39   | 16(16) | 4 | 0.3414  |  |



**Table S5 | Relation of significantly different RT-qPCR data from Table S3 to that of ND1 or ENO2 in for SN DA neurons from NCS-1 WT and KO mice.** Data and statistics for graphs shown in **Figure 5**. pg cDNA/ $\mu\text{m}^2 \times 100$  data is normalized to pg cDNA/cell of ND1 or respective ENO2. (n) indicates the number of detected qPCR signals, from all tested cell pools (given in brackets), derived from (N) mice. P-values according to Mann-Whitney-U tests and significant differences are marked with (\*).

|               | NCS-1 WT                                                         |           |          |        |        |    | NCS-1 KO |           |          |        |        |    | p-value            |
|---------------|------------------------------------------------------------------|-----------|----------|--------|--------|----|----------|-----------|----------|--------|--------|----|--------------------|
|               | mean                                                             | $\pm$ SEM | $\pm$ SD | median | n      | N  | mean     | $\pm$ SEM | $\pm$ SD | median | n      | N  |                    |
|               | <b>Relative qPCR results, normalized to neuron size and ND1</b>  |           |          |        |        |    |          |           |          |        |        |    |                    |
| <b>UCP4</b>   | 0.44                                                             | 0.03      | 0.08     | 0.45   | 9(9)   | 3  | 0.25     | 0.03      | 0.11     | 0.28   | 10(10) | 3  | <b>0.0003*</b>     |
| <b>UCP5</b>   | 0.16                                                             | 0.02      | 0.07     | 0.13   | 9(9)   | 3  | 0.10     | 0.02      | 0.05     | 0.08   | 9(10)  | 3  | <b>0.0503*</b>     |
| <b>DJ-1</b>   | 1.44                                                             | 0.10      | 0.35     | 1.42   | 13(13) | 6  | 1.28     | 0.09      | 0.28     | 1.28   | 9(14)  | 6  | 0.2921             |
| <b>Cav2.3</b> | 2.21                                                             | 0.17      | 0.75     | 2.00   | 20(20) | 5  | 1.24     | 0.13      | 0.55     | 1.15   | 19(20) | 4  | <b>&lt;0.0001*</b> |
| <b>ENO2</b>   | 0.28                                                             | 0.02      | 0.15     | 0.26   | 86(88) | 18 | 0.28     | 0.01      | 0.14     | 0.27   | 87(94) | 18 | 0.9722             |
|               | <b>Relative qPCR results, normalized to neuron size and ENO2</b> |           |          |        |        |    |          |           |          |        |        |    |                    |
| <b>UCP4</b>   | 0.21                                                             | 0.01      | 0.04     | 0.21   | 9(9)   | 3  | 0.14     | 0.02      | 0.07     | 0.13   | 10(10) | 3  | <b>0.0350*</b>     |
| <b>UCP5</b>   | 0.08                                                             | 0.01      | 0.04     | 0.06   | 9(9)   | 3  | 0.06     | 0.01      | 0.04     | 0.05   | 9(10)  | 3  | 0.1615             |
| <b>DJ-1</b>   | 1.43                                                             | 0.25      | 0.86     | 1.22   | 12(13) | 6  | 1.92     | 0.60      | 1.80     | 1.14   | 9(14)  | 6  | 0.9170             |
| <b>Cav2.3</b> | 1.05                                                             | 0.11      | 0.50     | 0.82   | 20(20) | 5  | 0.84     | 0.10      | 0.42     | 0.71   | 18(20) | 4  | 0.1957             |
| <b>ND1</b>    | 0.19                                                             | 0.02      | 0.15     | 0.11   | 84(88) | 18 | 0.15     | 0.01      | 0.09     | 0.11   | 81(94) | 18 | 0.5682             |
